# Supplementary material for: Proficiency testing for bacterial whole genome sequencing: an end-user survey of current capabilities, requirements and priorities
Source: PubMed Central journal article supplement (PMC4392855; doi:10.1186/s12879-015-0902-3), 2015-04-03

**Table S1. Costs of bacterial NGS by platform as reported by respondents at time of survey**

| Sequencing platform      | <US\$ 100        | US\$ 101-500 | US\$ 501-1000 | >US\$ 1000 |
|--------------------------|------------------|--------------|---------------|------------|
| Ion Torrent PGM internal | 0                | 11           | 0             | 0          |
| Ion Torrent PGM external | 1                | 1            | 0             | 0          |
| Ion Torrent Proton       | No data provided |              |               |            |
| GS Junior System (454)   | No data provided |              |               |            |
| GS FLX (454) internal    | 0                | 0            | 2             | 2          |
| GS FLX (454) external    | 0                | 0            | 0             | 1          |
| PacBio RS internal       | 0                | 0            | 3             | 1          |
| PacBio RS external       | 0                | 0            | 0             | 1          |
| PacBio RS II internal    | 0                | 2            | 2             | 0          |
| HiScanSQ external        | 1                | 0            | 0             | 1          |
| HiSeq 1000 external      | 0                | 0            | 0             | 1          |
| HiSeq 1500               | No data provided |              |               |            |

|                         |                   |                   |                |                |
|-------------------------|-------------------|-------------------|----------------|----------------|
| HiSeq 2000 internal     | 1                 | 2                 | 0              | 0              |
| HiSeq 2000 external     | 0                 | 1                 | 1              | 0              |
| HiSeq 2500 internal     | 4                 | 3                 | 0              | 0              |
| HiSeq 2500 external     | 1                 | 0                 | 0              | 1              |
| GA IIx internal         | 1                 | 2                 | 0              | 0              |
| MiSeq Benchtop internal | 9                 | 13                | 1              | 0              |
| MiSeq Benchtop external | 1                 | 3                 | 0              | 1              |
| ABI SOLiD               | No data provided  |                   |                |                |
| Other                   | No data provided  |                   |                |                |
| <b>Total internal</b>   | <b>15</b>         | <b>33</b>         | <b>8</b>       | <b>3</b>       |
| <b>Total external</b>   | <b>4</b>          | <b>5</b>          | <b>1</b>       | <b>6</b>       |
| <b>Grand total</b>      | <b>19 (25.3%)</b> | <b>38 (50.7%)</b> | <b>9 (12%)</b> | <b>9 (12%)</b> |

**Table S2. Volume of bacterial NGS performed annually by respondents (Q10)**

| <b>Sequencing platform</b>  | <b>1-10</b>      | <b>11-100</b> | <b>101-500</b> | <b>501-2,000</b> | <b>&gt;2,000</b> |
|-----------------------------|------------------|---------------|----------------|------------------|------------------|
| Ion Torrent PGM<br>internal | 0                | 3             | 6              | 0                | 0                |
| Ion Torrent PGM<br>external | 2                | 1             | 0              | 0                | 0                |
| Ion Torrent Proton          | No data provided |               |                |                  |                  |
| GS Junior (454)             | No data provided |               |                |                  |                  |
| GS FLX (454)<br>internal    | 0                | 0             | 1              | 0                | 0                |
| GS FLX (454)<br>external    | 0                | 0             | 0              | 0                | 0                |
| PacBio RS internal          | 0                | 2             | 2              | 0                | 0                |

|                          |                  |   |   |   |   |
|--------------------------|------------------|---|---|---|---|
| PacBio RS external       | 0                | 1 | 0 | 0 | 0 |
| PacBio RS II<br>internal | 0                | 3 | 1 | 0 | 0 |
| HiScanSQ external        | 0                | 0 | 1 | 0 | 0 |
| HiSeq 1000<br>external   | 0                | 1 | 0 | 0 | 0 |
| HiSeq 1500               | No data provided |   |   |   |   |
| HiSeq 2000<br>internal   | 0                | 1 | 0 | 2 | 0 |
| HiSeq 2000<br>external   | 0                | 2 | 0 | 0 | 1 |
| HiSeq 2500<br>internal   | 0                | 0 | 1 | 3 | 3 |
| HiSeq 2500<br>external   | 0                | 1 | 0 | 0 | 0 |

|                            |                  |                 |                   |                   |                 |
|----------------------------|------------------|-----------------|-------------------|-------------------|-----------------|
| GA Iix internal            | 1                | 0               | 0                 | 2                 | 0               |
| MiSeq Benchtop<br>internal | 1                | 2               | 9                 | 10                | 1               |
| MiSeq Benchtop<br>external | 0                | 4               | 1                 | 0                 | 1               |
| ABI SOLiD                  | No data provided |                 |                   |                   |                 |
| Other                      | No data provided |                 |                   |                   |                 |
| <b>Total internal</b>      | <b>2</b>         | <b>11</b>       | <b>20</b>         | <b>17</b>         | <b>4</b>        |
| <b>Total external</b>      | <b>2</b>         | <b>10</b>       | <b>2</b>          | <b>0</b>          | <b>2</b>        |
| <b>Grand total</b>         | <b>4 (5.7%)</b>  | <b>21 (30%)</b> | <b>22 (31.4%)</b> | <b>17 (24.3%)</b> | <b>6 (8.6%)</b> |

**Table S3. Preferred number of strains per dispatch of PT for NGS**

| <b>PT sample type</b>                                               | <b>1</b> | <b>2</b> | <b>3</b> | <b>4</b> | <b>N/A</b> |
|---------------------------------------------------------------------|----------|----------|----------|----------|------------|
| 24.1 Microorganisms (bacterial) for DNA purification and sequencing | 4        | 4        | 9        | 16       | 3          |
| 24.2 Microorganisms (viral) for DNA purification and sequencing     | 2        | 2        | 4        | 12       | 13         |
| 24.3 Microorganisms (fungal) for DNA purification and sequencing    | 4        | 1        | 5        | 4        | 19         |
| 24.4 Microorganisms (protozoan) for DNA purification and sequencing | 4        | 4        | 3        | 4        | 17         |
| 24.5 Samples of DNA for sequencing                                  | 2        | 6        | 6        | 17       | 5          |
| 24.6 Datasets from NGS platforms for data analysis                  | 2        | 3        | 9        | 18       | 4          |

N/A – not applicable

**Table S4. Expected coverage while performing NGS for various taxa\***

|          | <b>less than 10</b> | <b>11-30</b> | <b>31-60</b> | <b>over 60</b> | <b>Not applicable</b> |
|----------|---------------------|--------------|--------------|----------------|-----------------------|
| Bacteria | 1                   | 8            | 19           | 7              | 2                     |
| Virus    | 0                   | 3            | 2            | 12             | 14                    |
| Fungus   | 0                   | 5            | 1            | 1              | 23                    |
| Protozoa | 1                   | 4            | 0            | 3              | 21                    |

\*coverage may be considered platform-dependent

Figure S1. Organism and data transfer arrangements in place

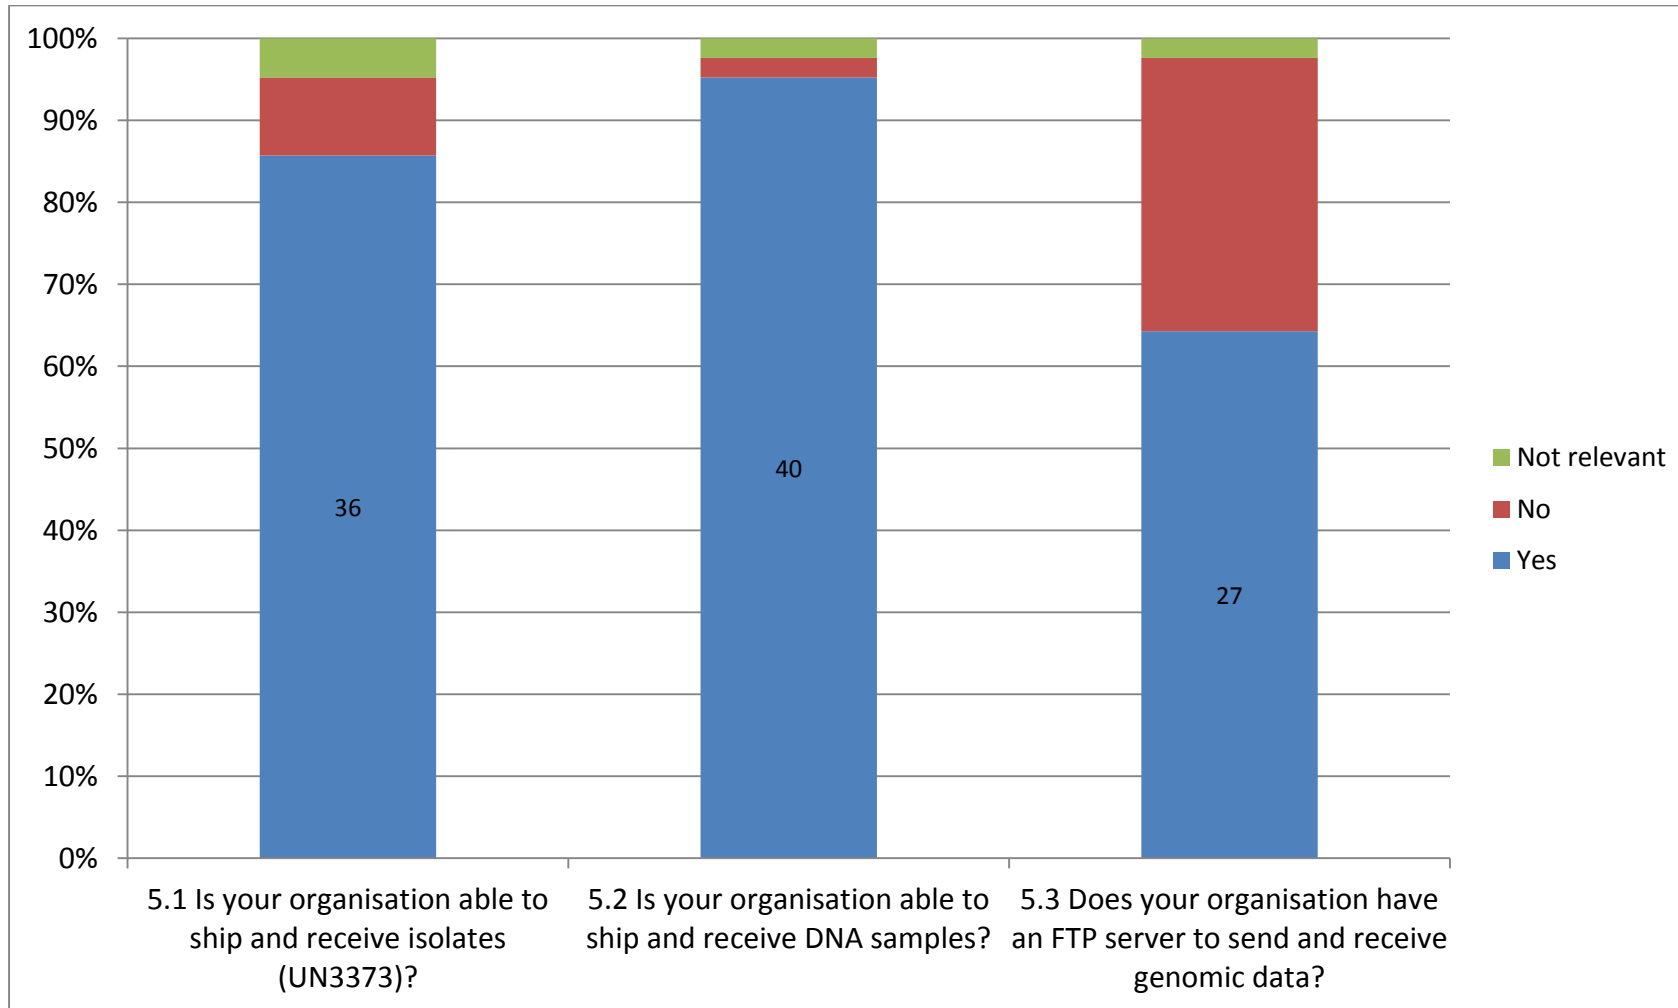



Figure S2a. NGS capability of participating institutions

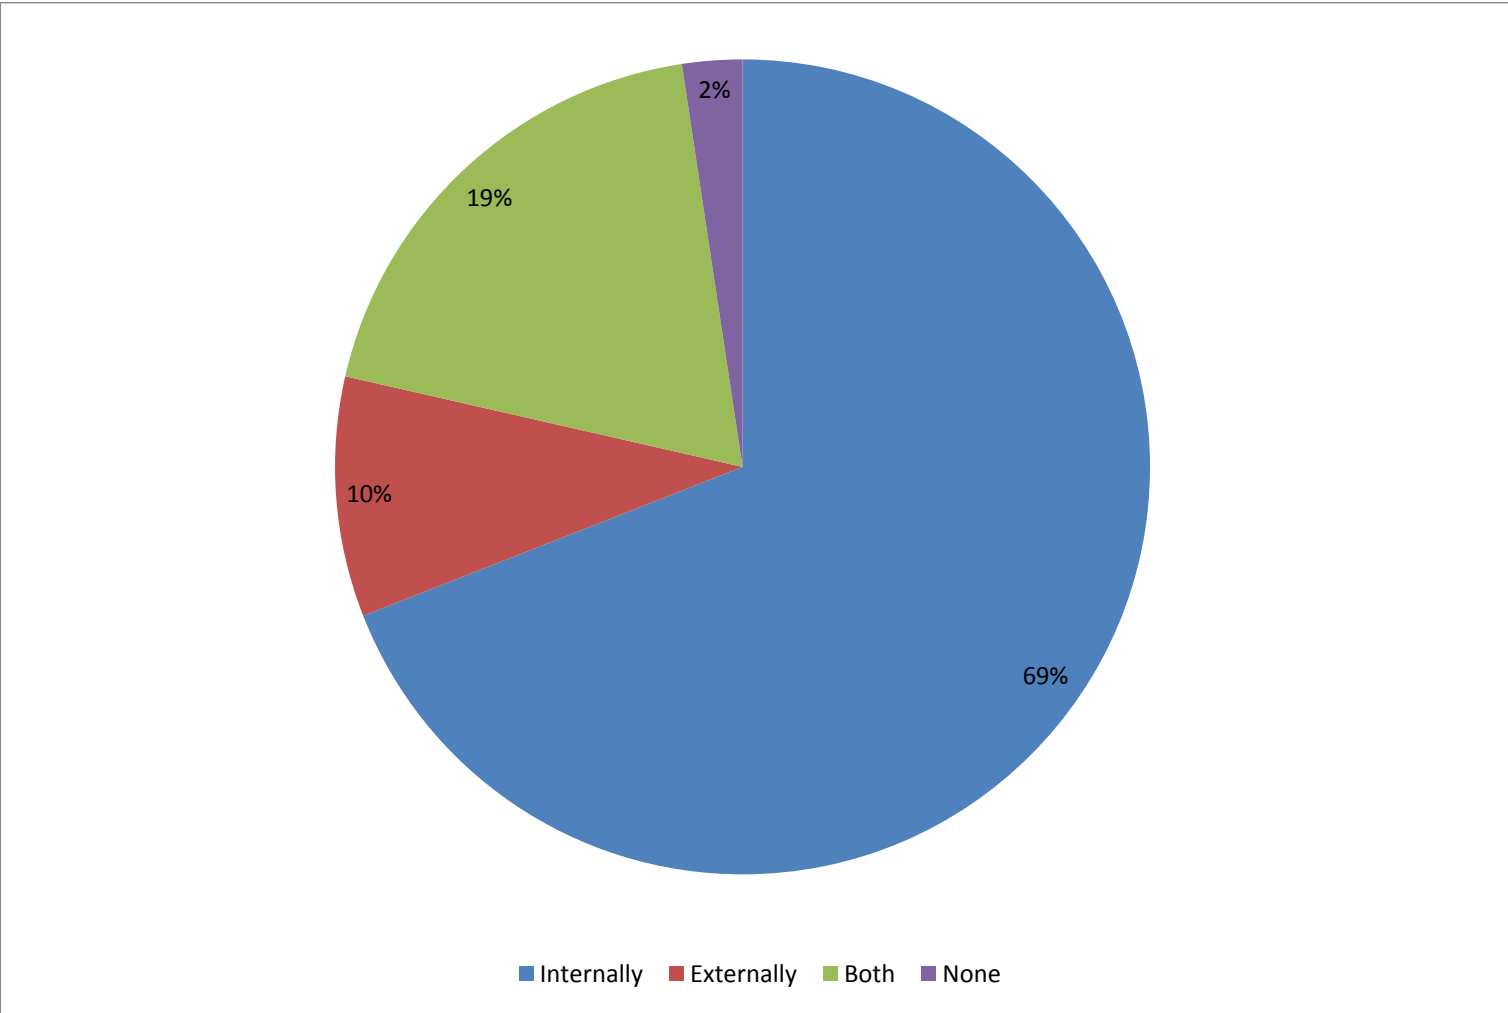

Figure S2b. Bioinformatics capability of participating institutions

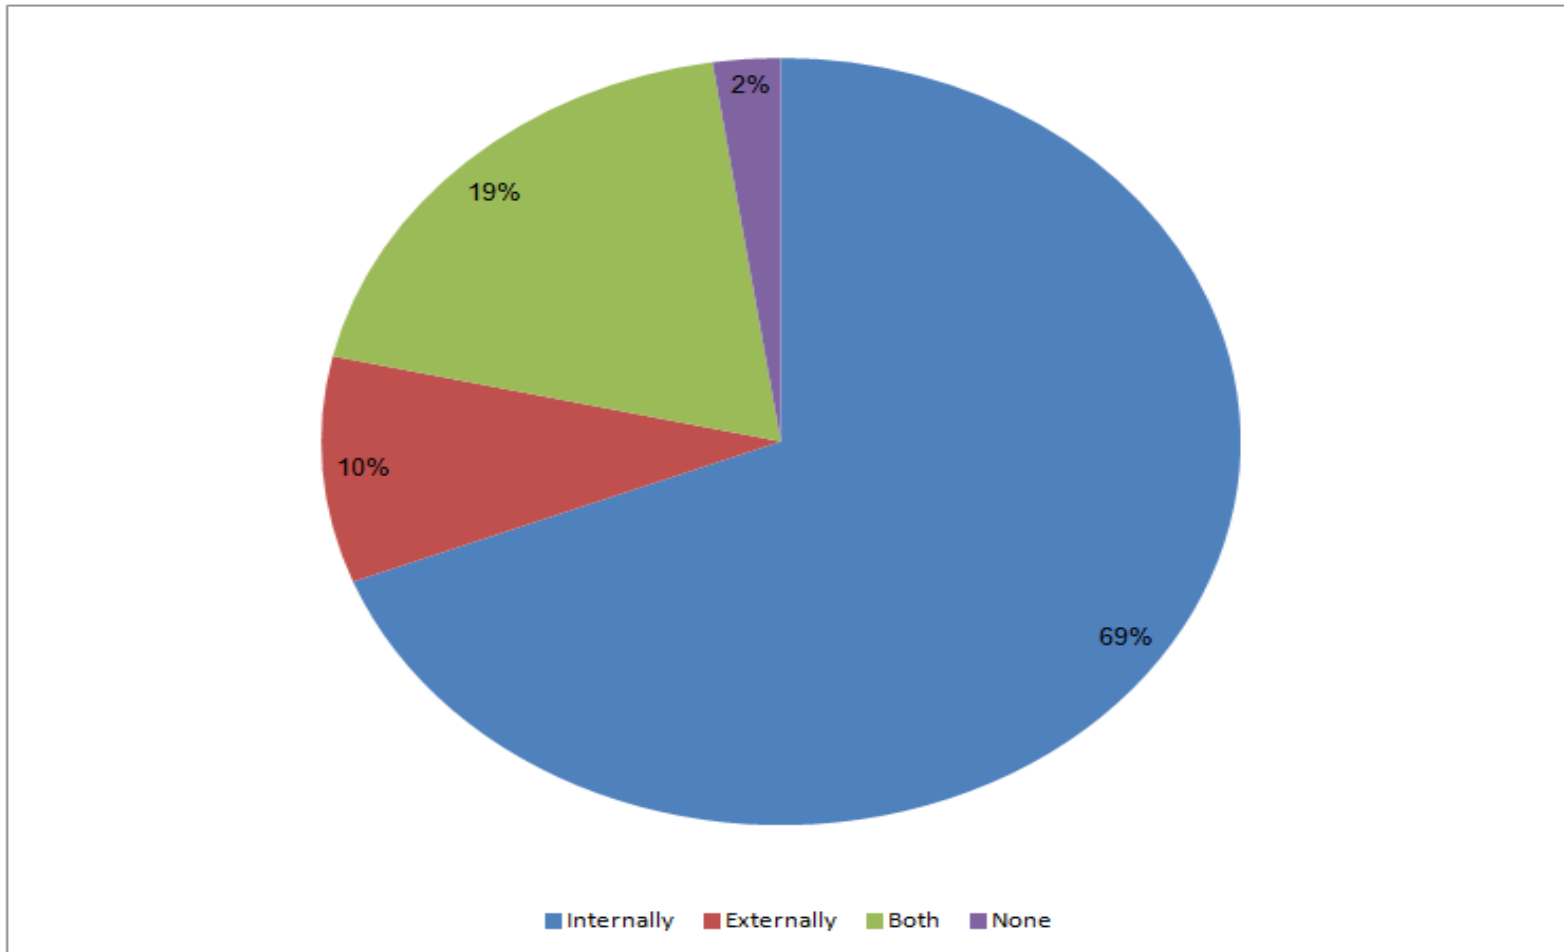

Figure S3. Distribution of NGS access across technologies

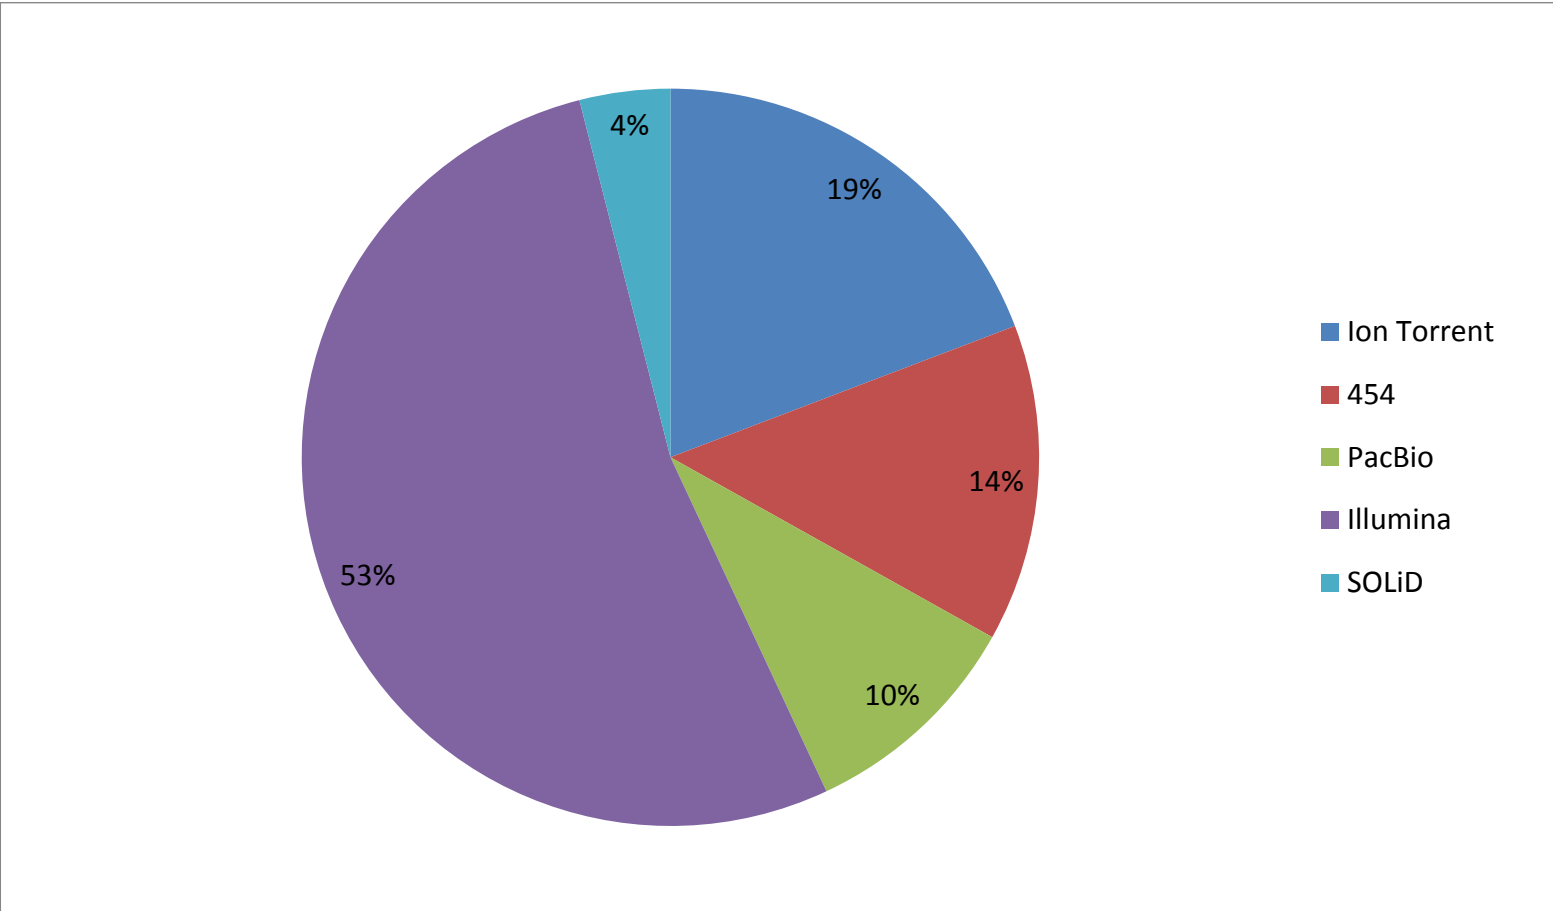

Figure S4a. Distribution of top priority pathogens most commonly processed in participating institutions

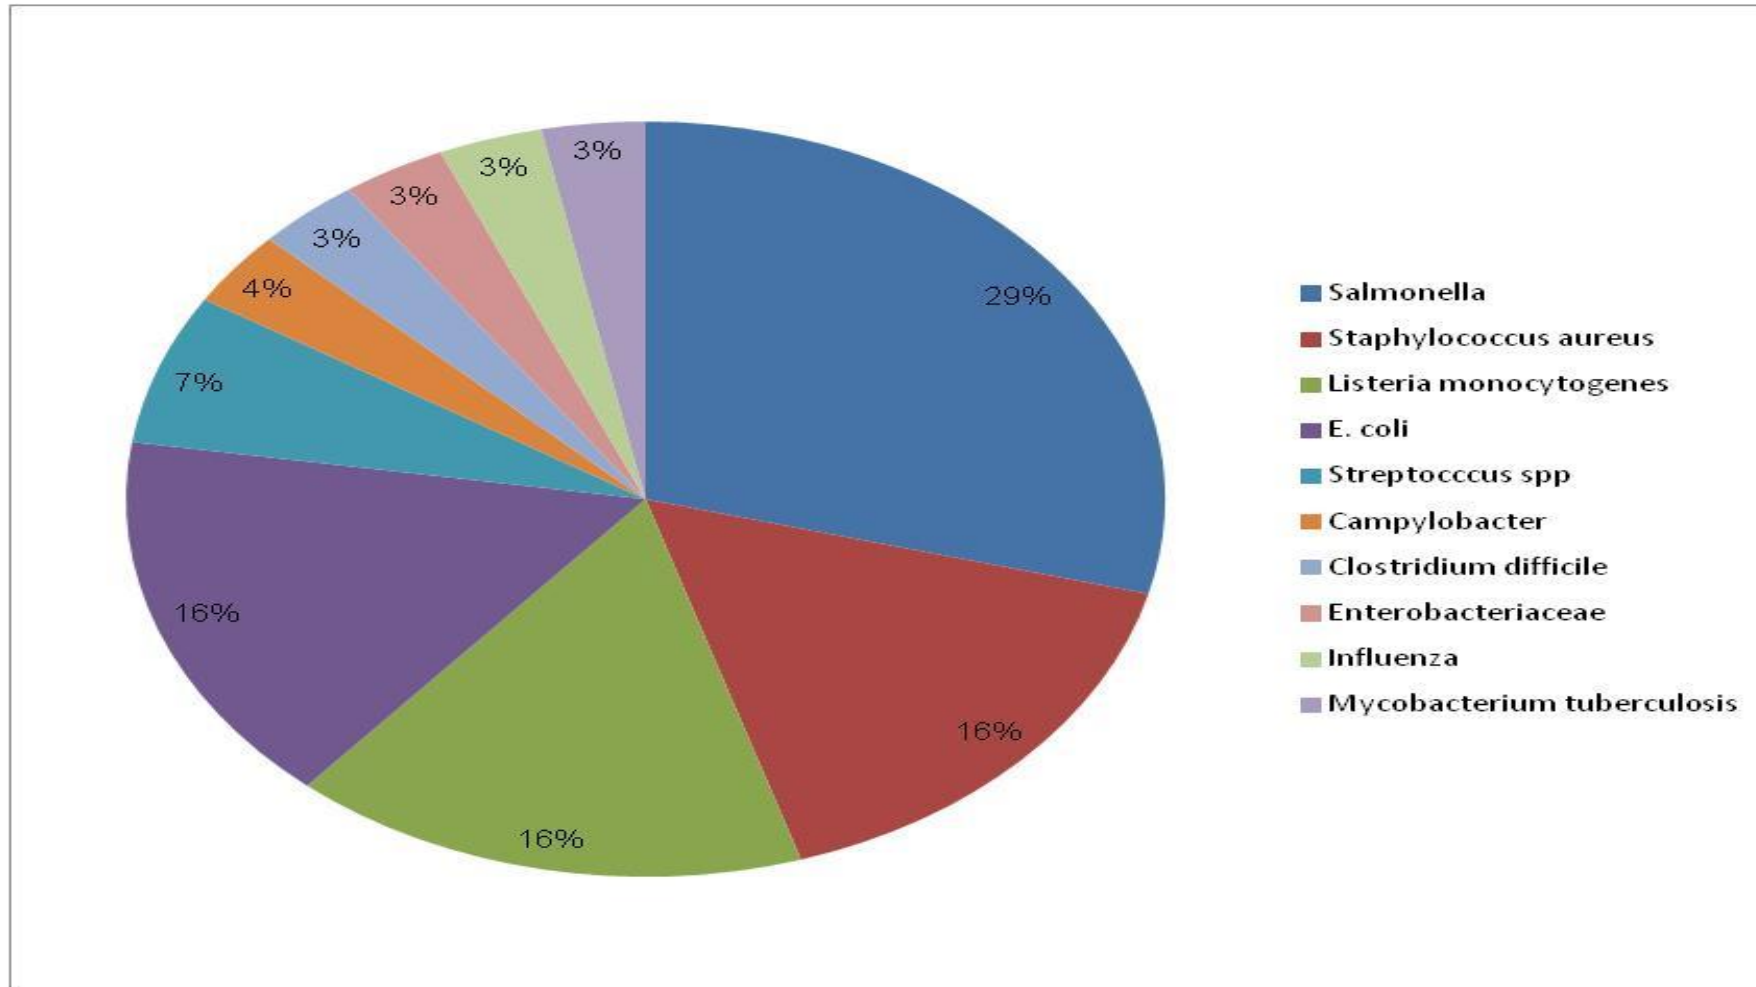

Figure S4b. Distribution of pathogens most commonly processed in participating institutions

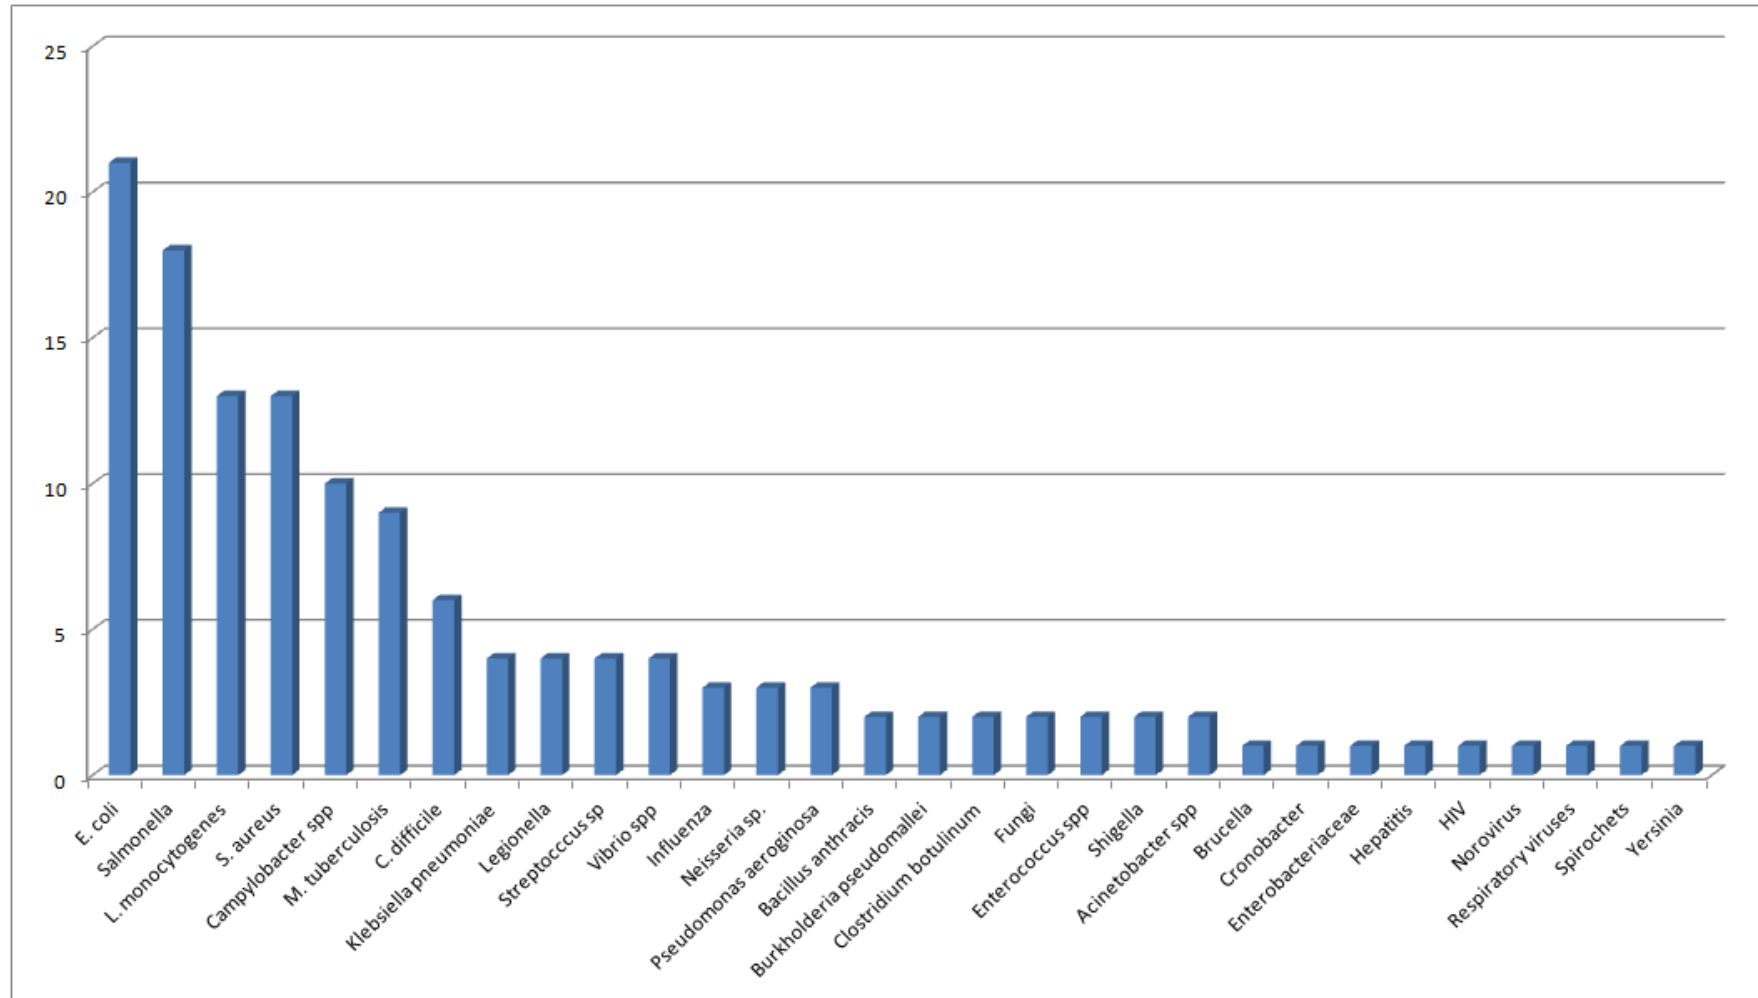

Figure S4c. Frequency of taxons genome-sequenced over passing year

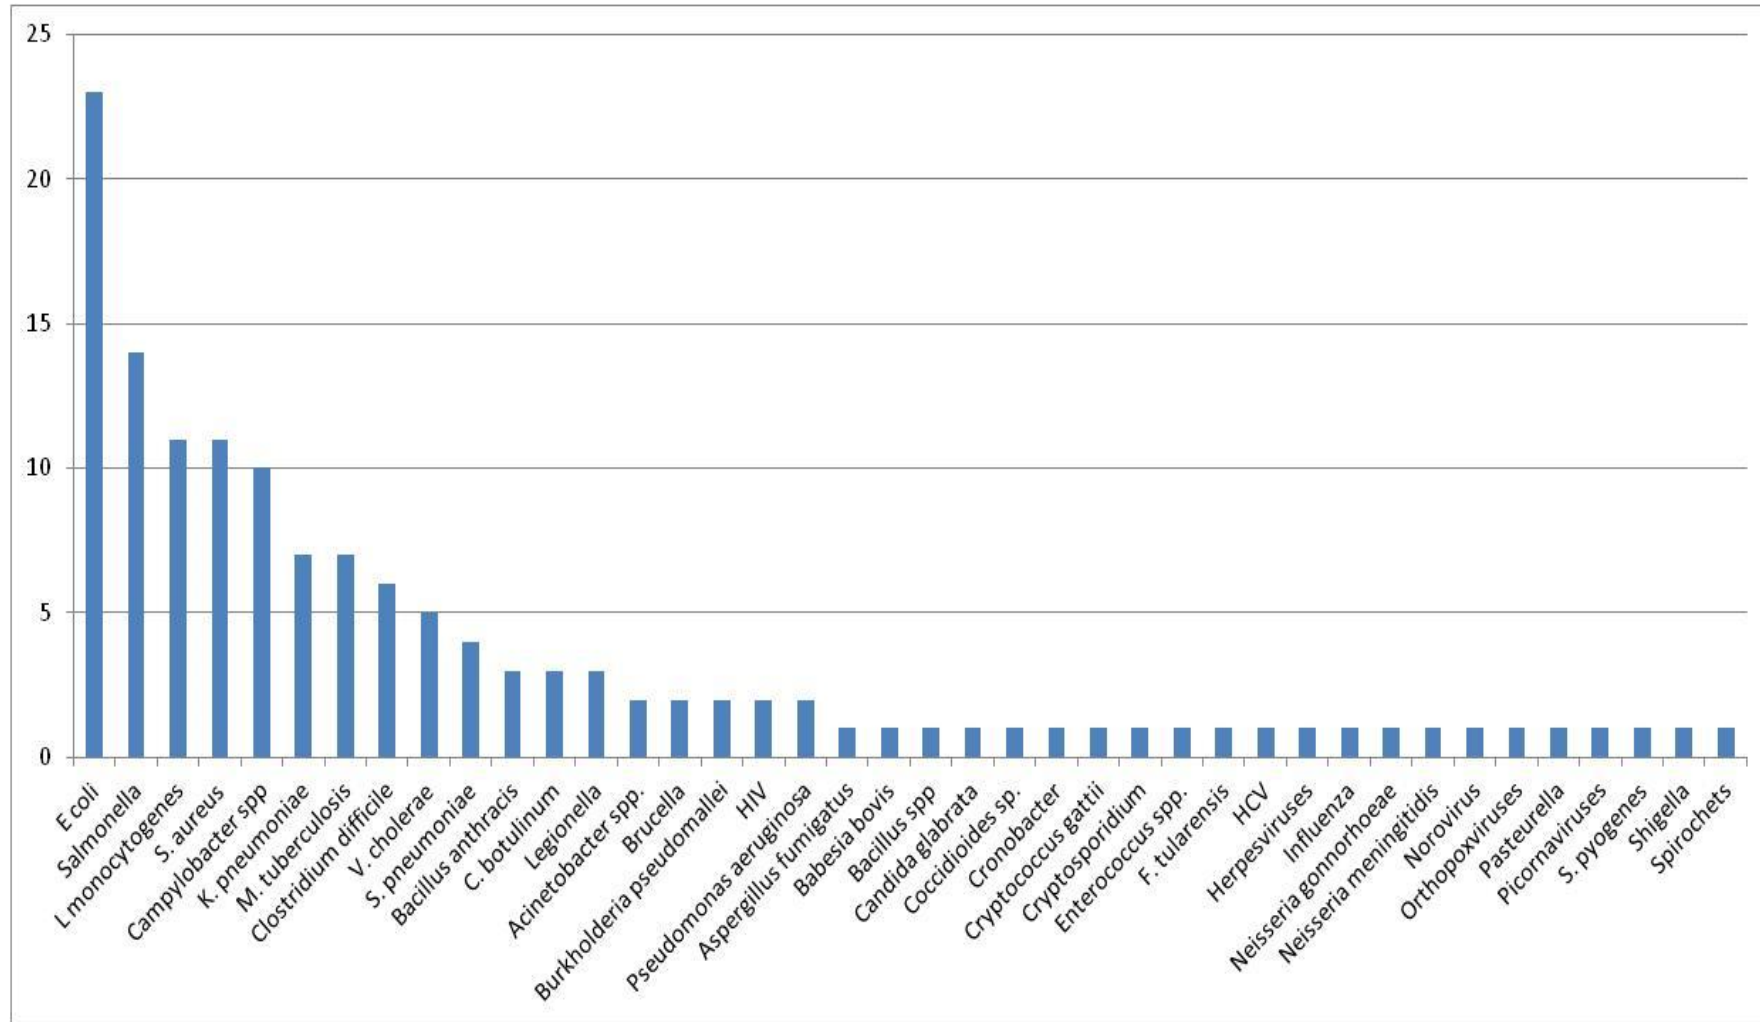

Figure S5a. Main purpose of NGS experiments (mean scores)

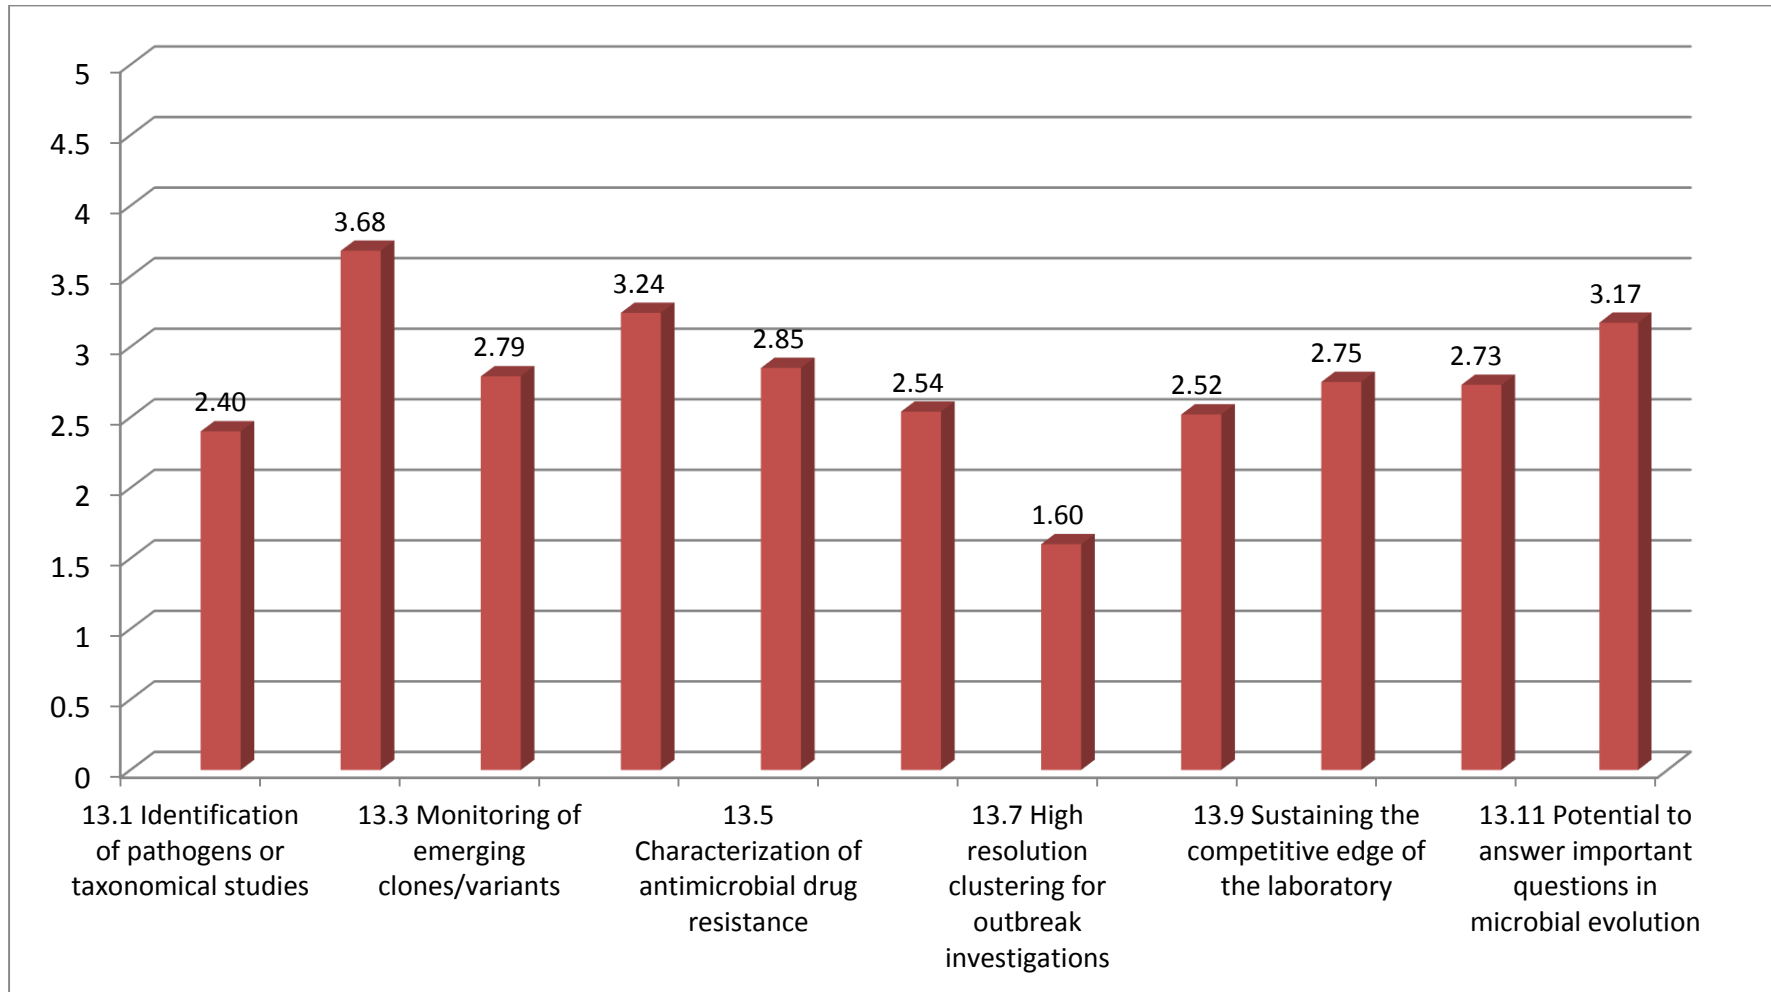

Figure S5b. Criteria for selecting pathogens for NGS experiments (mean scores)

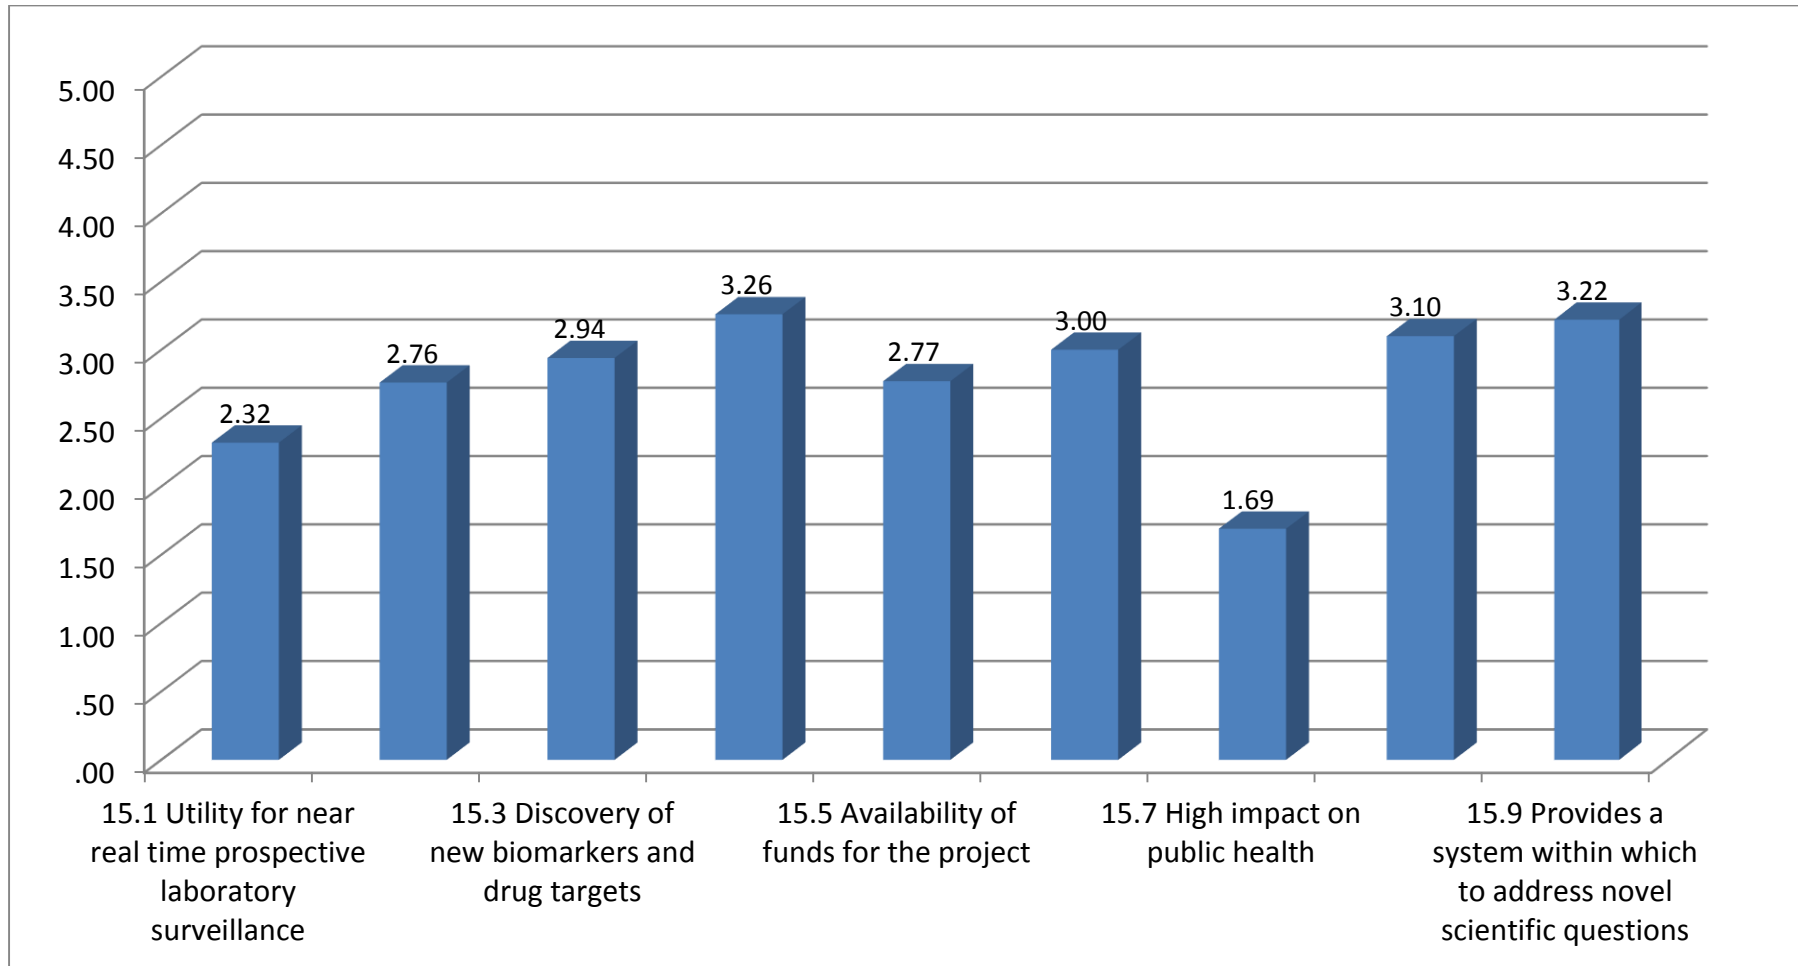



Figure S6. Library preparation methods employed for NGS

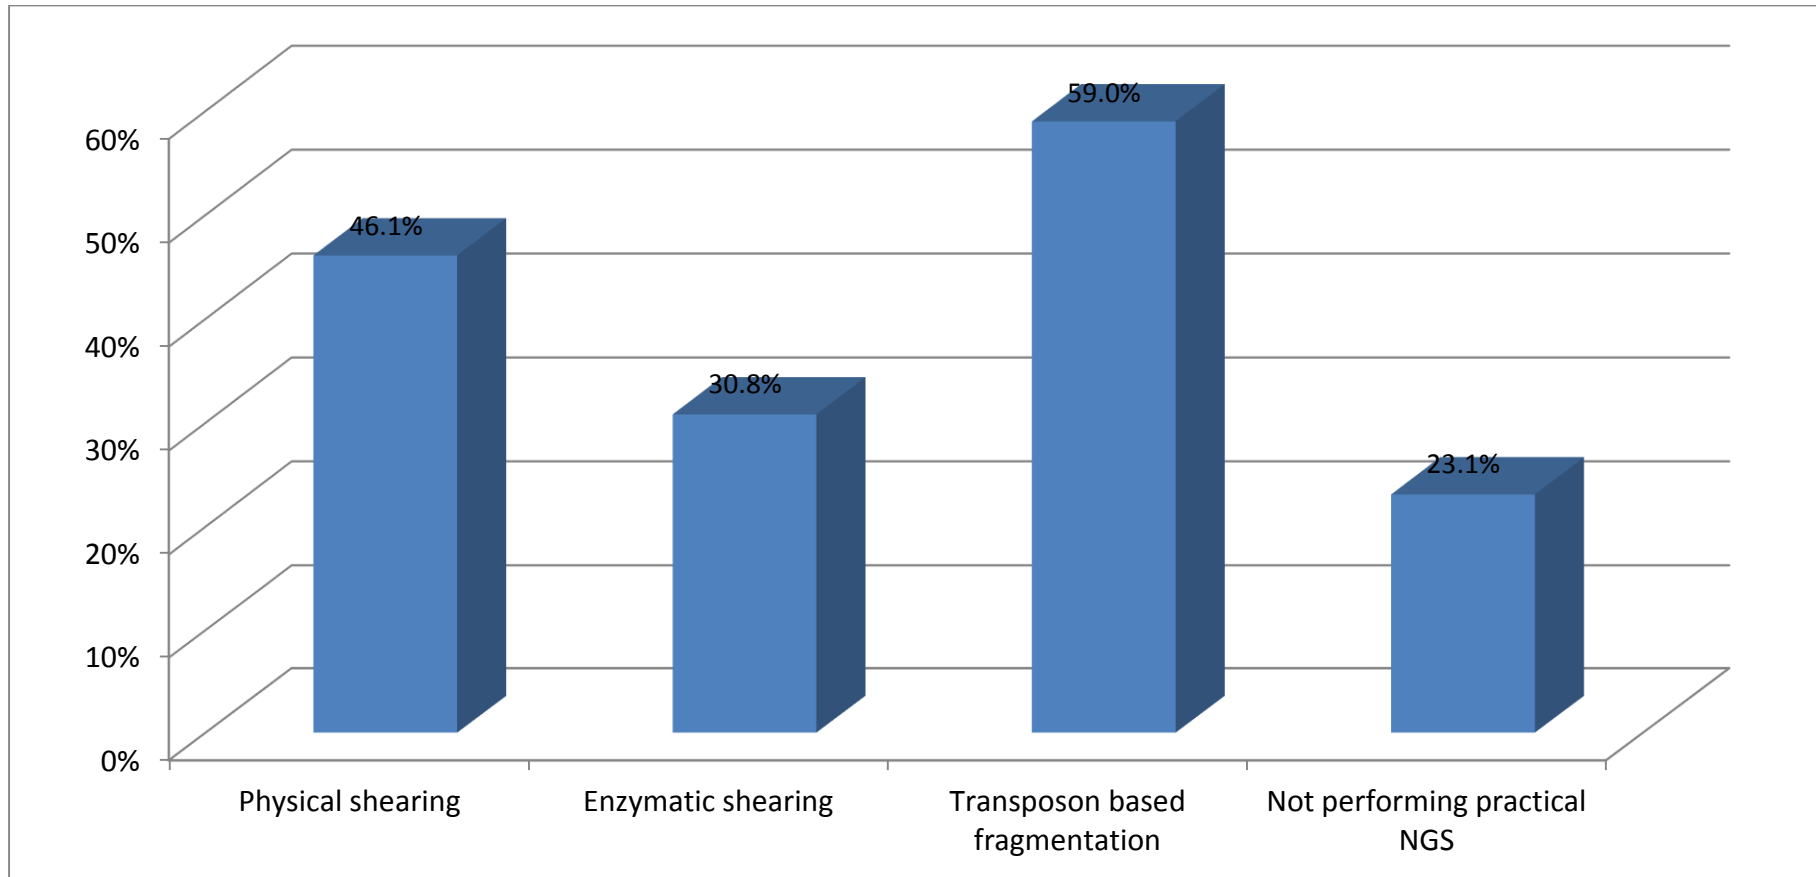

\*coverage may be considered platform-dependent

Figure S7. Perception of the importance of quality filtering during NGS analysis

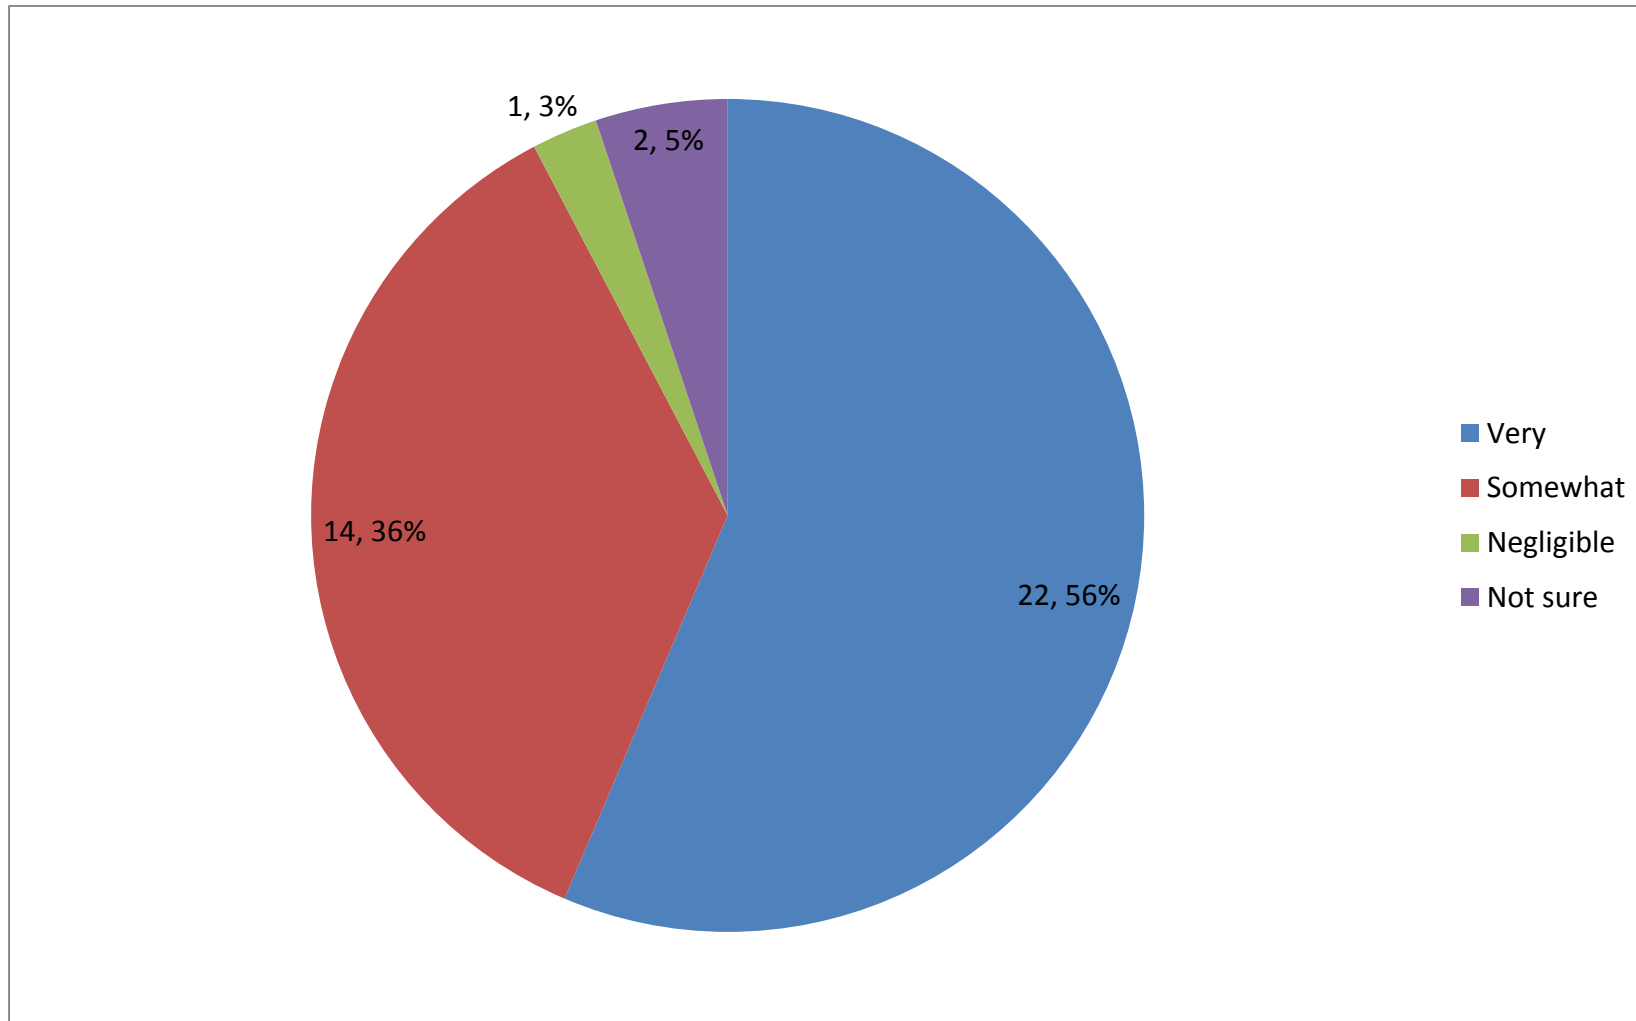

Figure S8. Frequency of criteria used for QA/QC of assemblies

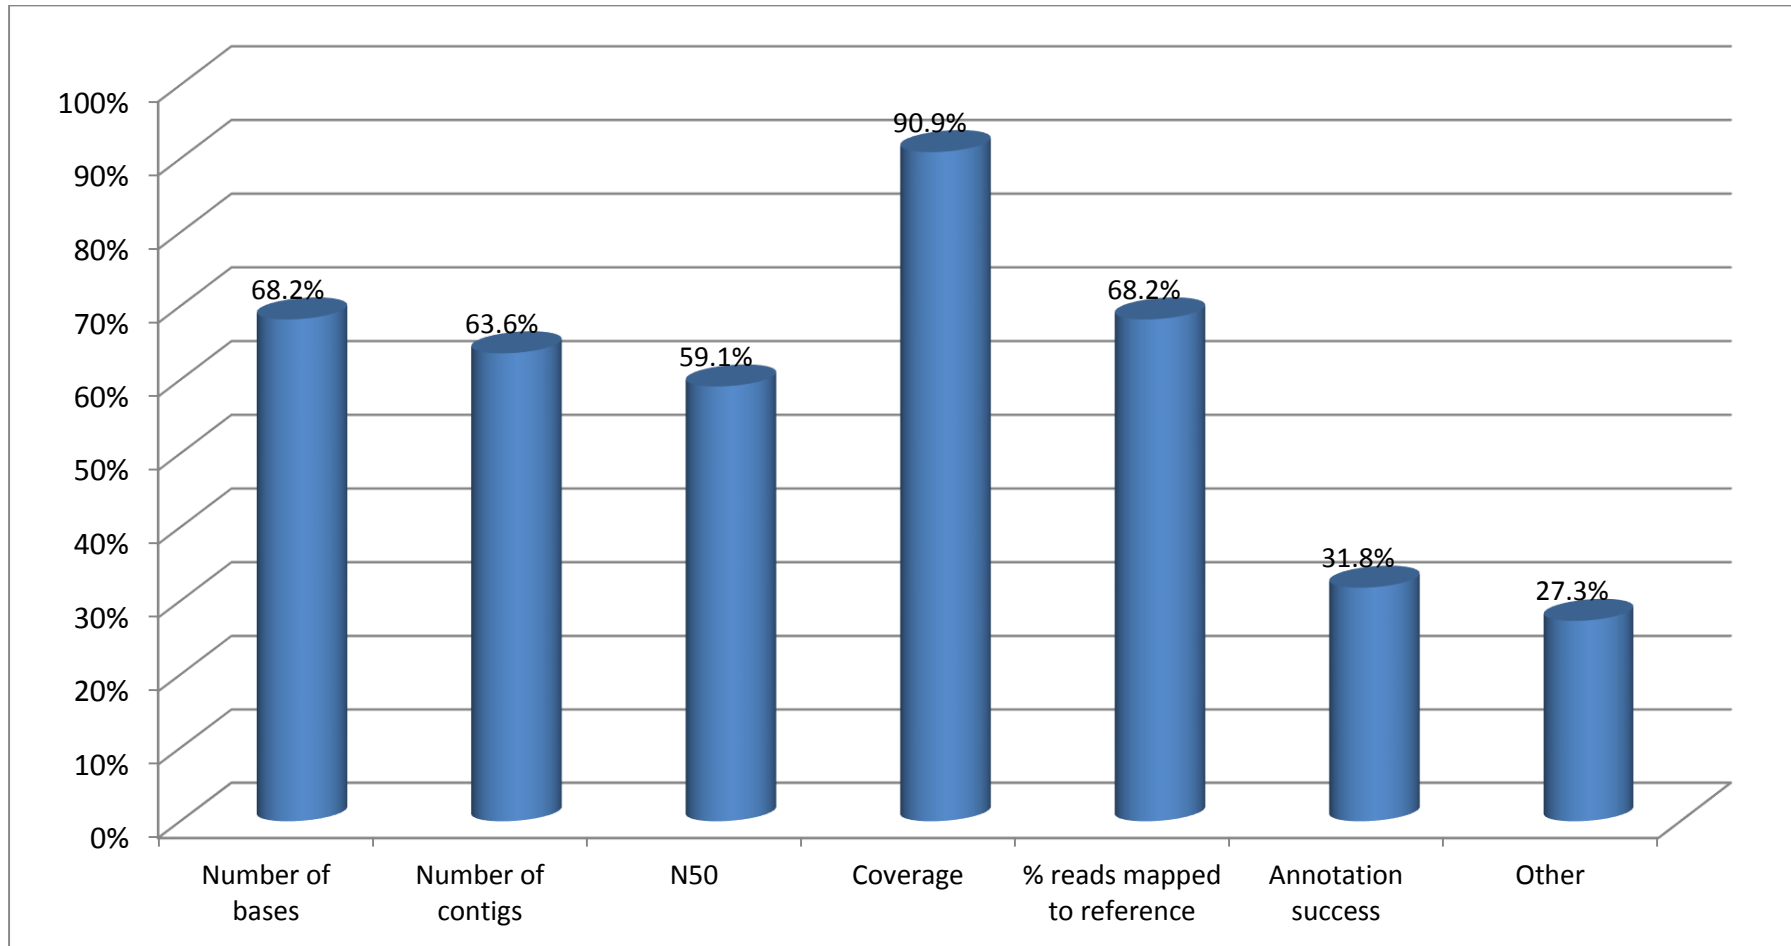

Figure S9. Use of bioinformatics software for analysis

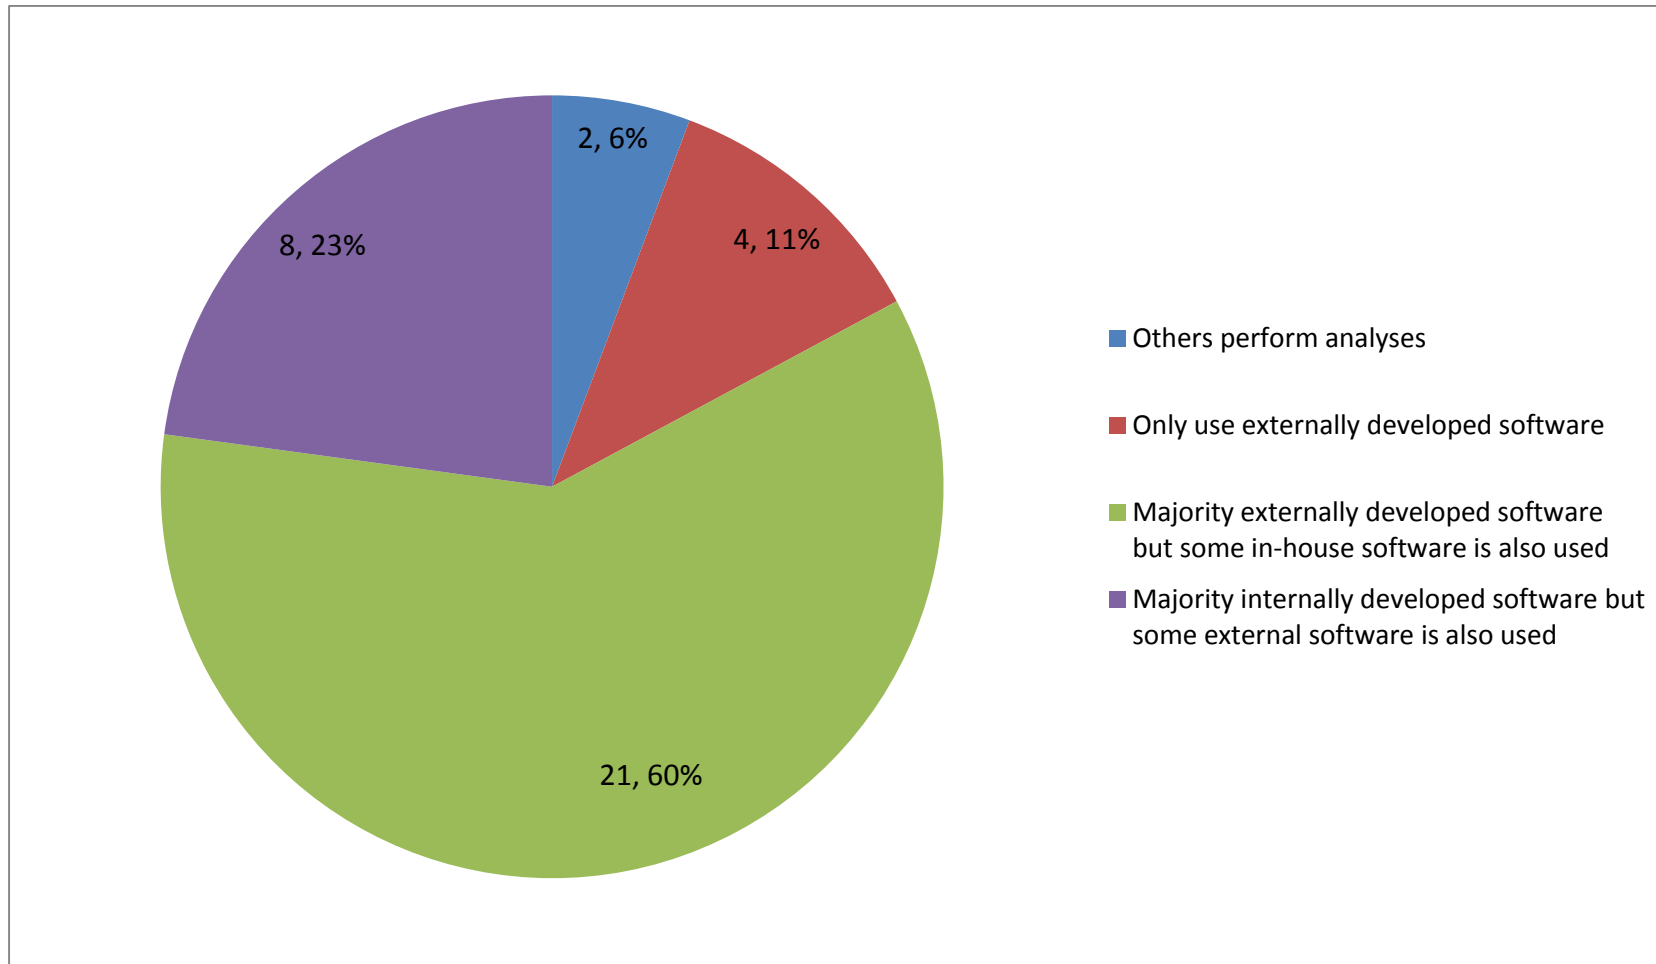

Supplement: 12879_2015_902_MOESM1_ESM.pdf [file 12879_2015_902_MOESM1_ESM.pdf]
